# Supplementary material for: Novel Bi-Specific Immuno-Modulatory Tribodies Potentiate T Cell Activation and Increase Anti-Tumor Efficacy
Source: MDPI journal article supplement (doi:10.3390/ijms23073466), 2022-03-23
Supplement: s1 [file s1]

# Novel Bi-Specific Immuno-Modulatory Tribodies Potentiate T Cell Activation And Increase Anti-Tumor Efficacy

Margherita Passariello<sup>1,2</sup>, Asami Yoshioka<sup>3</sup>, Kota Takahashi<sup>3</sup>, Shu-ichi Hashimoto<sup>3</sup>, Rosa Rapuano Lembo<sup>2,4</sup>, Lorenzo Manna<sup>1,2</sup>, Koji Nakamura<sup>3</sup> and Claudia De Lorenzo<sup>1,2\*</sup>

1 Department of Molecular Medicine and Medical Biotechnology, University of Naples "Federico II", 80131 Naples, Italy

2 Ceinge - Biotechnologie Avanzate s.c. a.r.l., via Gaetano Salvatore 486, 80145 Naples, Italy

3 Chiome Bioscience Inc, 3-12-1 Hommachi Shibuya-Ku, Tokyo 151-0071 Japan

4 European School of Molecular Medicine, University of Milan, 20122 Milan, Italy

\* Correspondence: cladelor@unina.it; Tel.: +39-081-3737868

## Supplementary Figures and Legends

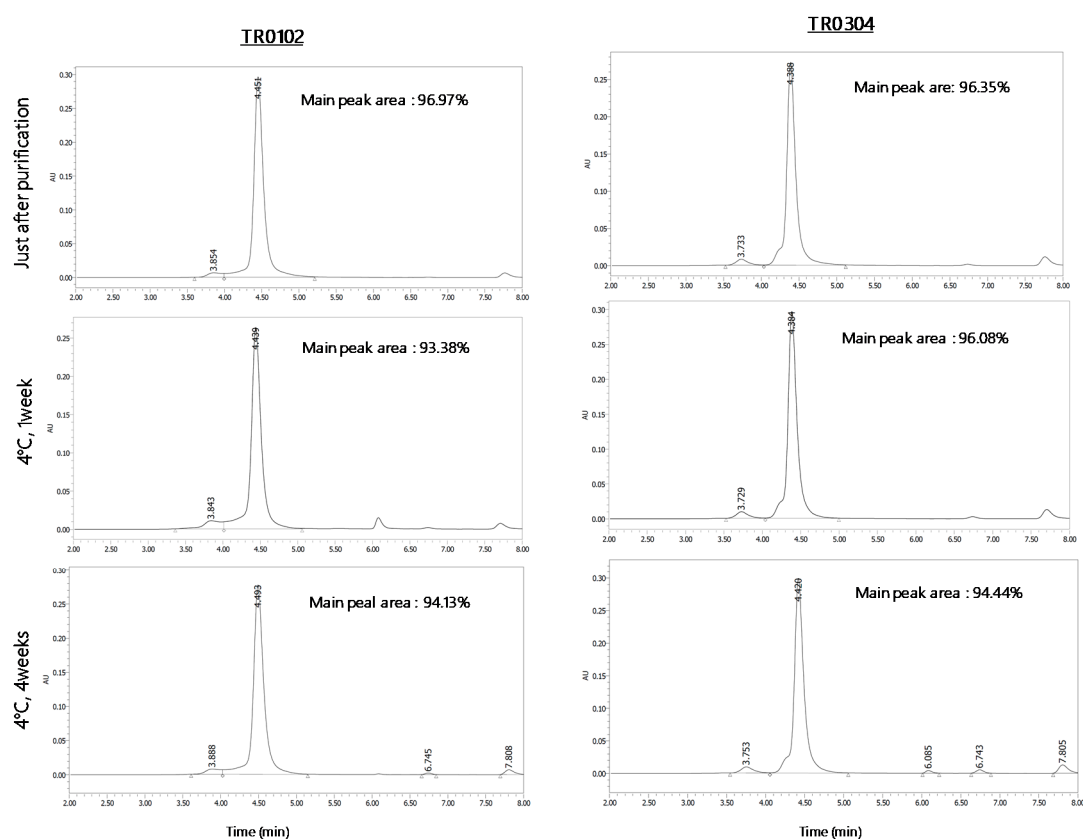

**Figure S1.** SEC Analysis. The analysis of the purified samples to verify the stability of tribodies was also performed after storage at 4°C for up to 4 weeks.

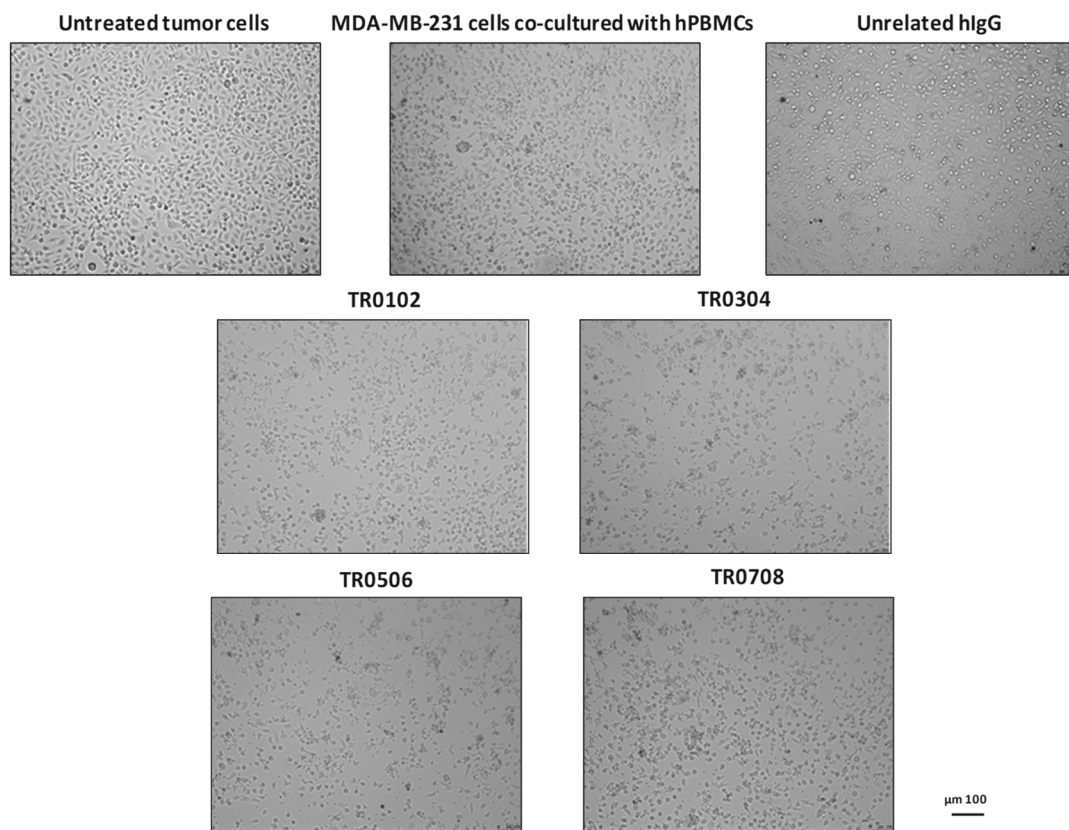

**Figure S2.** Representative images of MDA-MB-231 cells co-cultured with hPBMCs and treated with the indicated tribodies.
